# Supplementary material
Source: publisher figshare collection journal article supplement (https://acs.figshare.com/ndownloader/files/3977794)
Supplement: Supplementary file 1 [file 3977794]

## Conformational biases of linear motifs

**Elio A. Cino<sup>†</sup>, Wing-Yiu Choy<sup>†\*</sup> and Mikko Karttunen<sup>†\*</sup>**

*Department of Chemistry and Waterloo Institute for Nanotechnology<sup>†</sup>, University of Waterloo, Waterloo, Ontario, Canada N2L 3G1,*

*Department of Biochemistry<sup>‡</sup>, The University of Western Ontario, London, Ontario, Canada N6A 5C1*

\*Corresponding authors: [jchoy4@uwo.ca](mailto:jchoy4@uwo.ca), [mkarttu@gmail.com](mailto:mkarttu@gmail.com)

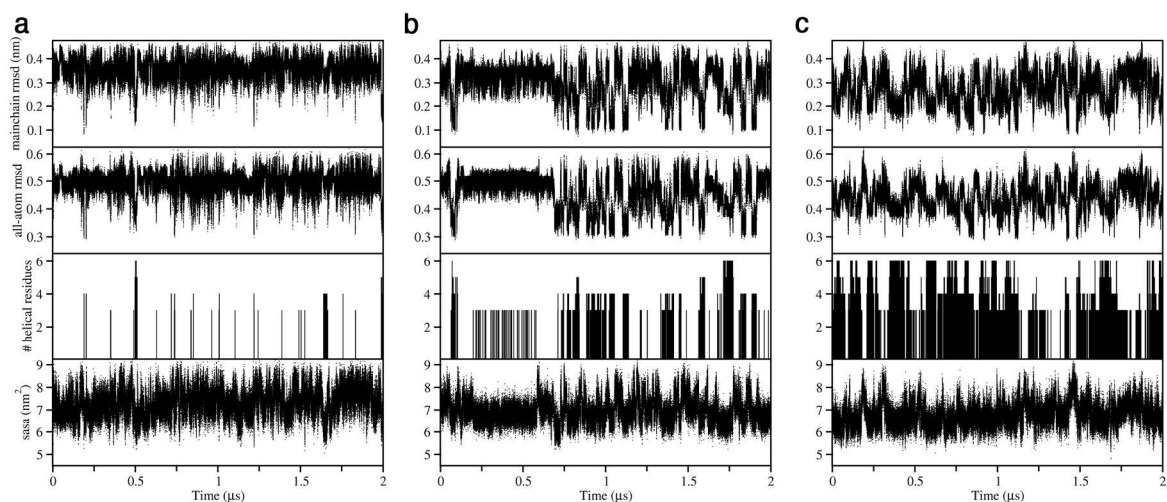

**Figure S1.** ExoS – 14-3-3 complexed to uncomplexed state comparison. a) GROMOS96 53a6, b) GROMOS96 54a7, and c) Amber99SB\*-ILDN. Mainchain and all-atom rmsds to the complexed state and peptide helicity measurement. For the rmsd calculations, 7 residues (GLLDALD), including 28 mainchain (N, C <sub>$\alpha$</sub> , C', and CO) and 49 non-hydrogen atoms were compared. Peptide helicity was the sum of residues in all helix types ( $\alpha$ ,  $3_{10}$ , and  $\pi$ ) as assigned by the DSSP algorithm. Solvent accessible surface areas were calculated using the g\_sas tool<sup>1-3</sup>.

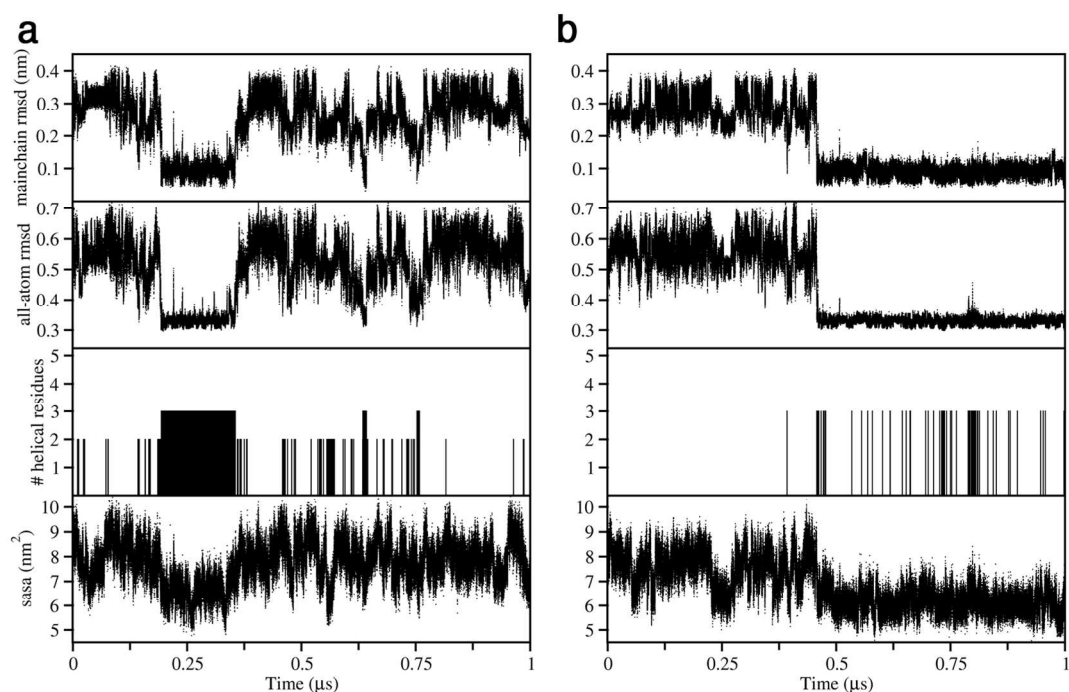

**Figure S2.** Amphiophysin 1 – Clathrin complexed to uncomplexed state comparison. a) GROMOS96 53a6 and b) GROMOS96 54a7. Mainchain and all-atom rmsds to the complexed state and peptide helicity measurement. For the rmsd calculations, 7 residues (TLPWDLW), including 28 mainchain (N, C<sub>α</sub>, C', and CO) and 66 non-hydrogen atoms were compared. Peptide helicity was the sum of residues in a 3<sub>10</sub> helix as assigned by the DSSP algorithm. Solvent accessible surface areas were calculated using the g\_sas tool<sup>1-3</sup>.

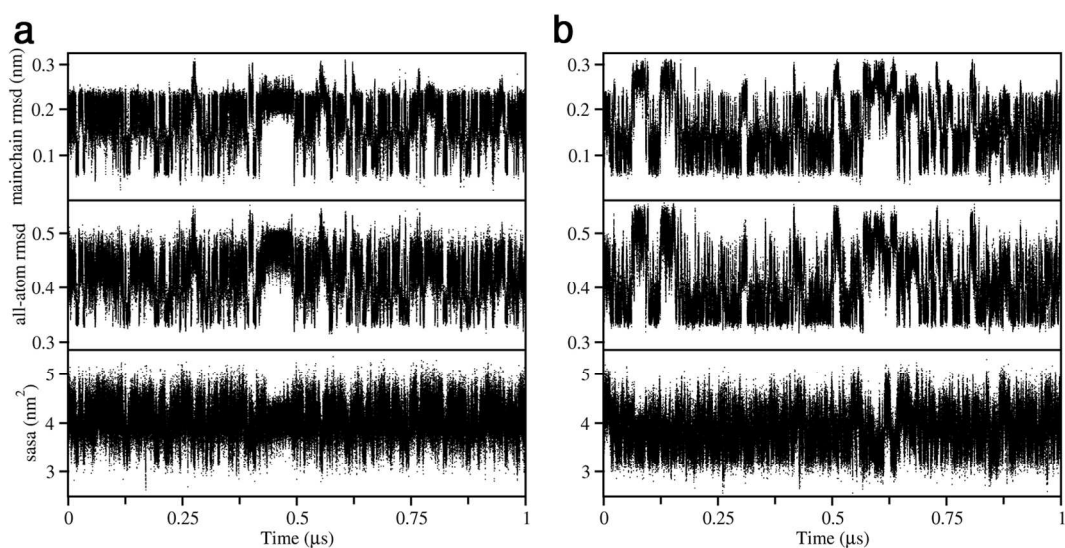

**Figure S3.**  $\beta$ -arrestin 2 – Clathrin complexed to uncomplexed state comparison. a) GROMOS96 53a6 and b) GROMOS96 54a7. Mainchain and all-atom rmsds to the complexed state. For the rmsd calculations, 5 residues (NLIEF), including 20 mainchain (N, C $_{\alpha}$ , C', and CO) and 44 non-hydrogen atoms were compared. Solvent accessible surface areas were calculated using the g\_sas tool<sup>1-3</sup>.

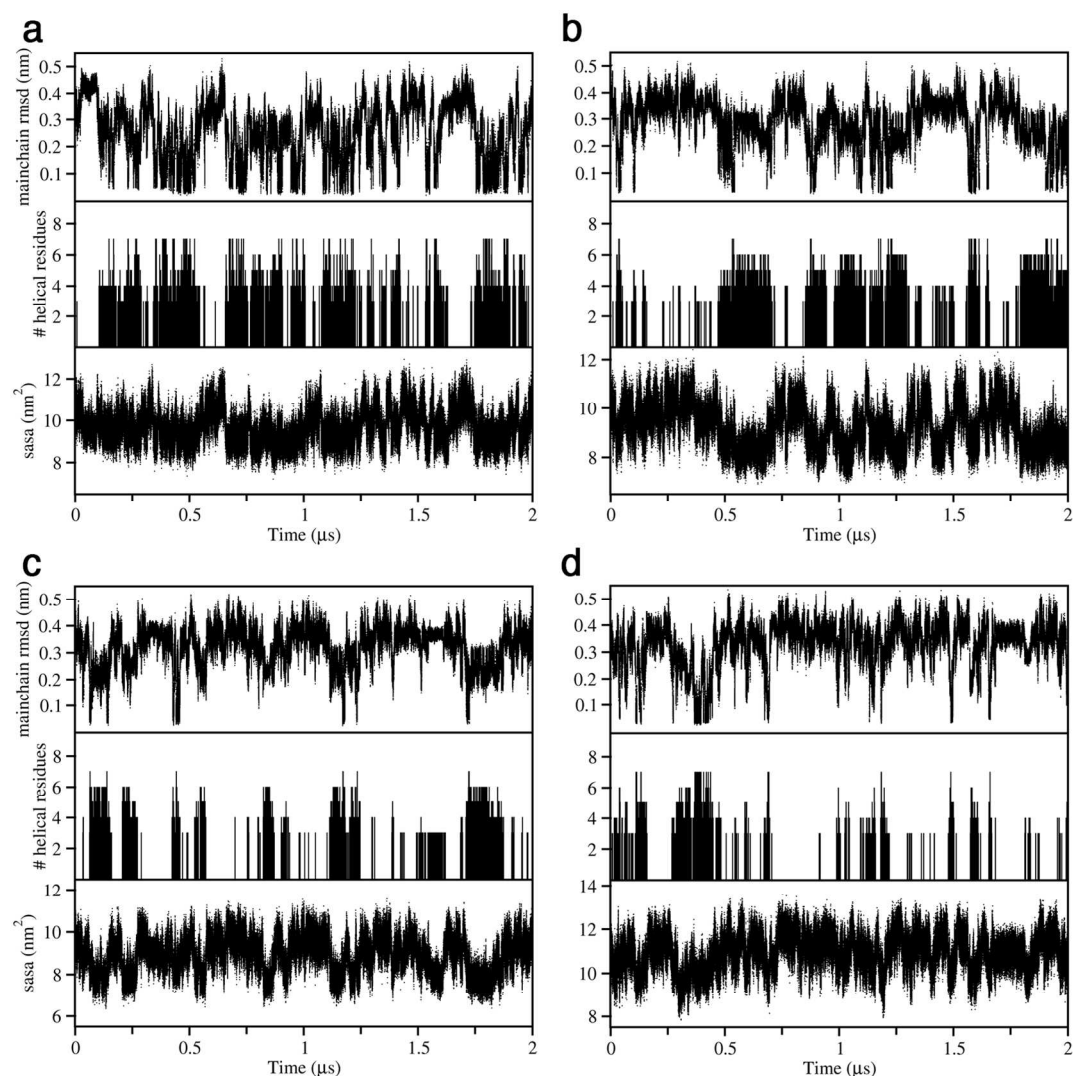

**Figure S4.** LxxLL motif complexed to uncomplexed state comparison for duplicate set of MD simulations. Mainchain rmsds to the RIP140 L5 complexed state structure (a, optimized peptide; b, c, d, RIP140 L6, L7 and L3 peptides, respectively). For the rmsd calculations, the corresponding mainchain atoms of the different motifs were compared to the same 9-residue (SLLLHLLKS) segment of the L5 motif, which includes 36 mainchain (N, C $_{\alpha}$ , C', and CO) atoms. Peptide helicity was the sum of residues in all helix types ( $\alpha$ ,  $3_{10}$ , and  $\pi$ ) as assigned by the DSSP algorithm. Solvent accessible surface areas were calculated using the g\_sas tool<sup>1-3</sup>.

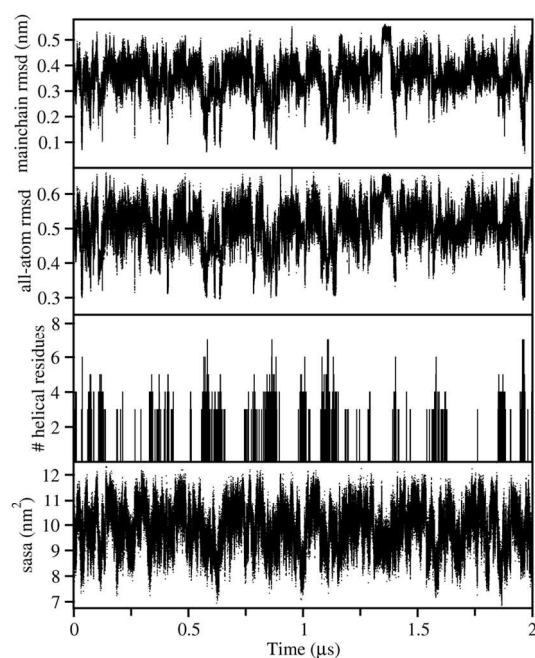

**Figure S5.** Tcf4 –  $\beta$ -catenin complexed to uncomplexed state comparison for the duplicate simulation. Mainchain and all-atom rmsds to the complexed state. For the rmsd calculations, 10 residues (DLADVKSSLV), including 40 mainchain (N, C $_{\alpha}$ , C', and CO) and 72 non-hydrogen atoms were compared. Peptide helicity was the sum of residues in all helix types ( $\alpha$ ,  $3_{10}$ , and  $\pi$ ) as assigned by the DSSP algorithm. Solvent accessible surface areas were calculated using the g\_sas tool<sup>1-3</sup>.

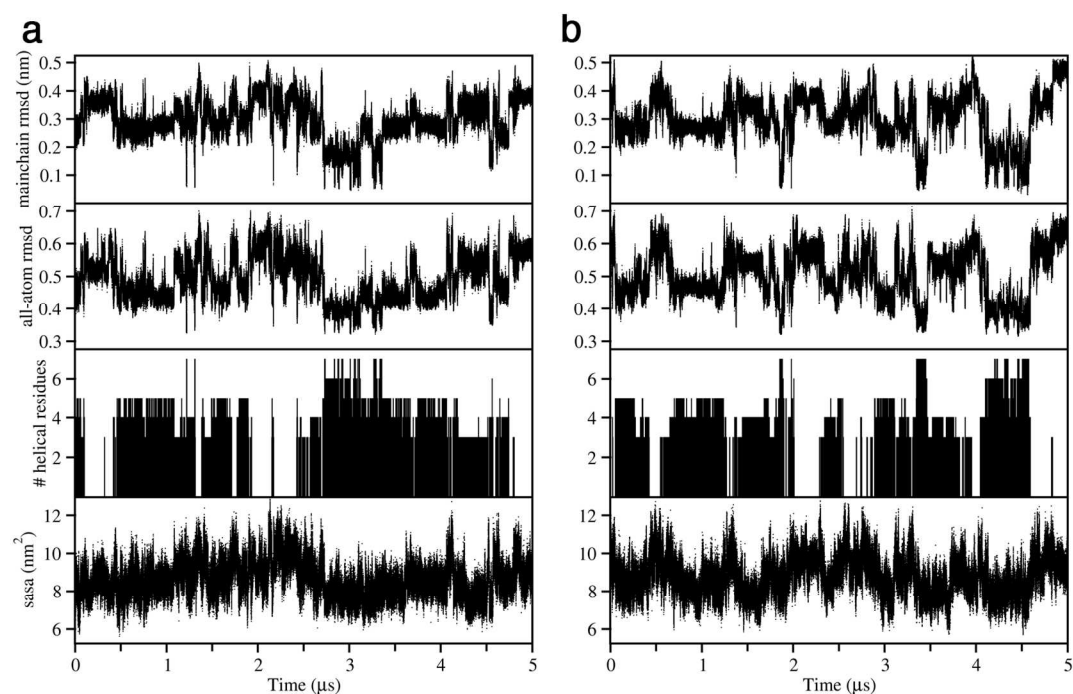

**Figure S6.** p53 TAD complexed to uncomplexed state comparison for the duplicate

simulations. a) WT and b) P27S peptides. For the rmsd calculations, 9 residues

(TFSDLWKLL), including 36 mainchain (N, C $_{\alpha}$ , C', and CO) and 79 non-hydrogen atoms

were compared to the corresponding atoms in the MDM2 bound state structure<sup>4</sup>. Peptide

helicity was the sum of residues in all helix types ( $\alpha$ ,  $3_{10}$ , and  $\pi$ ) as assigned by the DSSP

algorithm. Solvent accessible surface area was calculated using the g\_sas tool<sup>1-3</sup>.

## References

- (1) Eisenberg, D.; McLachlan, A. D. *Nature*. **1986**, *319*, 199-203.
- (2) Eisenhaber, F.; Lijnzaad, P.; Argos, P.; Sander, C.; Scharf, M. *J. Comput. Chem.* **1995**, *16*, 273-284.
- (3) Hess, B.; Kutzner, C.; van der Spoel, D.; Lindahl, E. *J. Chem. Theory. Comput.* **2008**, *4*, 435-447.
- (4) Kussie, P. H.; Gorina, S.; Marechal, V.; Elenbaas, B.; Moreau, J.; Levine, A. J.; Pavletich, N. P. *Science*. **1996**, *274*, 948-953.
